# Supplementary material
Source: PubMed Central journal article supplement (PMC5820960)
Supplement: IAI.00894-17_zii999092313s1.pdf [file IAI.00894-17_zii999092313s1.pdf]

Table S1 Predicted target genes for csRNA1-1

| Rank | Locus tag | Gene description (Gene)                                                             | Energy | Pvalue |
|------|-----------|-------------------------------------------------------------------------------------|--------|--------|
| 1    | SSA_2317  | Tfp pilus assembly protein, pilus retraction ATPase PilT                            | -15.87 | 0      |
| 2    | SSA_2345  | hypothetical protein                                                                | -14.36 | 0.001  |
| 3    | SSA_2216  | LPS biosynthesis protein ( <i>licD1</i> )                                           | -14.01 | 0.002  |
| 4    | SSA_1763  | molybdenum ABC transporter ATPase                                                   | -13.14 | 0.003  |
| 5    | SSA_2217  | Cps9H                                                                               | -12.43 | 0.006  |
| 6    | SSA_1635  | hypothetical protein                                                                | -11.89 | 0.008  |
| 7    | SSA_0227  | collagen-binding surface protein                                                    | -11.64 | 0.009  |
| 8    | SSA_1820  | hypothetical protein                                                                | -11.39 | 0.011  |
| 9    | SSA_1632  | surface protein                                                                     | -11.36 | 0.011  |
| 10   | SSA_0991  | deoxyribonuclease                                                                   | -11.16 | 0.012  |
| 11   | SSA_1168  | hypothetical protein                                                                | -11.06 | 0.013  |
| 12   | SSA_1702  | hypothetical protein                                                                | -10.95 | 0.014  |
| 13   | SSA_0926  | histone acetyltransferase HPA2-like acetyltransferase                               | -10.79 | 0.015  |
| 14   | SSA_1018  | Zinc metalloprotease zmpC                                                           | -10.71 | 0.016  |
| 15   | SSA_1736  | L-cysteine desulphydrase                                                            | -10.67 | 0.016  |
| 16   | SSA_0655  | cell division protein FtsA ( <i>ftsA</i> )                                          | -10.51 | 0.018  |
| 17   | SSA_1355  | hypothetical protein                                                                | -10.45 | 0.019  |
| 18   | SSA_0737  | arginine deiminase ( <i>sagP</i> )                                                  | -10.21 | 0.021  |
| 19   | SSA_2004  | Zinc metalloprotease zmpB ( <i>zmpB</i> )                                           | -10.12 | 0.022  |
| 20   | SSA_2205  | transcription antitermination protein NusG ( <i>nusG</i> )                          | -10.04 | 0.023  |
| 21   | SSA_0061  | tagatose 1,6-diphosphate aldolase                                                   | -9.96  | 0.024  |
| 22   | SSA_1544  | hypothetical protein                                                                | -9.84  | 0.025  |
| 23   | SSA_1899  | hypothetical protein                                                                | -9.84  | 0.025  |
| 24   | SSA_0146  | DNA repair ATPase                                                                   | -9.82  | 0.025  |
| 25   | SSA_0293  | hypothetical protein                                                                | -9.7   | 0.027  |
| 26   | SSA_1634  | Heme utilization/adhesion exoprotein                                                | -9.58  | 0.029  |
| 27   | SSA_2121  | cell wall surface anchor family protein                                             | -9.55  | 0.029  |
| 28   | SSA_1110  | hypothetical protein                                                                | -9.53  | 0.029  |
| 29   | SSA_0770  | ribonucleotide-diphosphate reductase subunit alpha ( <i>nrdE</i> )                  | -9.4   | 0.031  |
| 30   | SSA_2301  | S-layer protein ( <i>lytB</i> )                                                     | -9.3   | 0.033  |
| 31   | SSA_1631  | sortase ( <i>srtC</i> )                                                             | -9.25  | 0.033  |
| 32   | SSA_0849  | Signal peptidase I ( <i>sip</i> )                                                   | -9.1   | 0.036  |
| 33   | SSA_2208  | preprotein translocase subunit SecE ( <i>secE</i> )                                 | -9.08  | 0.036  |
| 34   | SSA_1044  | homoserine kinase ( <i>thrB</i> )                                                   | -9.05  | 0.036  |
| 35   | SSA_1020  | hypothetical protein                                                                | -9.01  | 0.037  |
| 36   | SSA_2309  | fimbrial assembly protein                                                           | -8.95  | 0.038  |
| 37   | SSA_0718  | hypothetical protein                                                                | -8.89  | 0.039  |
| 38   | SSA_2122  | hypothetical protein                                                                | -8.85  | 0.04   |
| 39   | SSA_1818  | very short patch repair endonuclease                                                | -8.79  | 0.041  |
| 40   | SSA_0121  | hypothetical protein                                                                | -8.71  | 0.042  |
| 41   | SSA_0758  | bifunctional ornithine acetyltransferase/N-acetylglutamate synthase ( <i>argJ</i> ) | -8.7   | 0.042  |
| 42   | SSA_1812  | modification methylase                                                              | -8.65  | 0.043  |
| 43   | SSA_1254  | hypothetical protein                                                                | -8.64  | 0.043  |
| 44   | SSA_2220  | galactosyltransferase                                                               | -8.59  | 0.044  |
| 45   | SSA_1727  | branched-chain amino acid ABC transporter permease ( <i>livM</i> )                  | -8.53  | 0.045  |
| 46   | SSA_2113  | hypothetical protein                                                                | -8.52  | 0.045  |
| 47   | SSA_2379  | signal transduction protein ( <i>comD</i> )                                         | -8.5   | 0.046  |
| 48   | SSA_0906  | CshA-like fibrillar surface protein C ( <i>crpC</i> )                               | -8.5   | 0.046  |
| 49   | SSA_0301  | hypothetical protein                                                                | -8.42  | 0.048  |
| 50   | SSA_0905  | CshA-like fibrillar surface protein B ( <i>crpB</i> )                               | -8.35  | 0.049  |
| 51   | SSA_1849  | primosome assembly protein PriA ( <i>priA</i> )                                     | -8.33  | 0.049  |
| 52   | SSA_1230  | hypothetical protein                                                                | -8.31  | 0.05   |

Table S2 Predicted target genes for csRNA1-2

| Rank | Locus tag | Gene description (Gene)                                       | Energy | Pvalue |
|------|-----------|---------------------------------------------------------------|--------|--------|
| 1    | SSA_2317  | Tfp pilus assembly protein, pilus retraction ATPase PilT      | -15.87 | 0      |
| 2    | SSA_2345  | hypothetical protein                                          | -14.36 | 0.001  |
| 3    | SSA_2216  | LPS biosynthesis protein ( <i>licD1</i> )                     | -14.01 | 0.002  |
| 4    | SSA_1655  | hypothetical protein                                          | -13.19 | 0.003  |
| 5    | SSA_2217  | Cps9H                                                         | -12.43 | 0.006  |
| 6    | SSA_1635  | hypothetical protein                                          | -11.89 | 0.008  |
| 7    | SSA_0227  | collagen-binding surface protein                              | -11.64 | 0.009  |
| 8    | SSA_0718  | hypothetical protein                                          | -11.59 | 0.01   |
| 9    | SSA_1632  | surface protein                                               | -11.36 | 0.011  |
| 10   | SSA_2177  | hypothetical protein                                          | -11.35 | 0.011  |
| 11   | SSA_1702  | hypothetical protein                                          | -11.2  | 0.012  |
| 12   | SSA_0991  | deoxyribonuclease                                             | -11.16 | 0.012  |
| 13   | SSA_1168  | hypothetical protein                                          | -11.06 | 0.013  |
| 14   | SSA_0521  | ethanolamine utilization protein EutL ( <i>eutL</i> )         | -10.88 | 0.015  |
| 15   | SSA_1018  | Zinc metalloprotease zmpC                                     | -10.71 | 0.016  |
| 16   | SSA_2131  | DNA-binding protein                                           | -10.67 | 0.016  |
| 17   | SSA_1736  | L-cysteine desulphydrase                                      | -10.67 | 0.016  |
| 18   | SSA_1809  | PTS system glucose-specific EIIC BA component ( <i>ptsG</i> ) | -10.64 | 0.017  |
| 19   | SSA_0131  | 30S ribosomal protein S11 ( <i>rpsK</i> )                     | -10.56 | 0.018  |
| 20   | SSA_0297  | malate dehydrogenase ( <i>mleS</i> )                          | -10.51 | 0.018  |
| 21   | SSA_1355  | hypothetical protein                                          | -10.45 | 0.019  |
| 22   | SSA_0737  | arginine deiminase ( <i>sagP</i> )                            | -10.21 | 0.021  |
| 23   | SSA_2004  | Zinc metalloprotease zmpB ( <i>zmpB</i> )                     | -10.12 | 0.022  |
| 24   | SSA_2205  | transcription antitermination protein NusG ( <i>nusG</i> )    | -10.04 | 0.023  |
| 25   | SSA_0061  | tagatose 1,6-diphosphate aldolase                             | -9.96  | 0.024  |
| 26   | SSA_1544  | hypothetical protein                                          | -9.84  | 0.025  |
| 27   | SSA_0146  | DNA repair ATPase                                             | -9.82  | 0.025  |
| 28   | SSA_0535  | propanediol utilization: dehydratase, medium subunit          | -9.62  | 0.028  |
| 29   | SSA_1634  | Heme utilization/adhesion exoprotein                          | -9.58  | 0.029  |
| 30   | SSA_1110  | hypothetical protein                                          | -9.53  | 0.029  |
| 31   | SSA_0133  | 50S ribosomal protein L17 ( <i>rpIQ</i> )                     | -9.45  | 0.03   |
| 32   | SSA_1400  | pyridoxamine kinase ( <i>pdxK</i> )                           | -9.44  | 0.031  |
| 33   | SSA_0448  | excinuclease ABC subunit A ( <i>uvrA</i> )                    | -9.31  | 0.032  |
| 34   | SSA_2301  | S-layer protein ( <i>lytB</i> )                               | -9.3   | 0.033  |
| 35   | SSA_0849  | Signal peptidase I ( <i>sip</i> )                             | -9.1   | 0.036  |
| 36   | SSA_2208  | preprotein translocase subunit SecE ( <i>secE</i> )           | -9.08  | 0.036  |
| 37   | SSA_1044  | homoserine kinase ( <i>thrB</i> )                             | -9.05  | 0.036  |
| 38   | SSA_1020  | hypothetical protein                                          | -9.01  | 0.037  |
| 39   | SSA_1987  | hypothetical protein                                          | -8.98  | 0.038  |
| 40   | SSA_2309  | fimbrial assembly protein                                     | -8.95  | 0.038  |
| 41   | SSA_1261  | ribose-5-phosphate isomerase A ( <i>rpiA</i> )                | -8.84  | 0.04   |
| 42   | SSA_1380  | hypothetical protein                                          | -8.84  | 0.04   |
| 43   | SSA_1818  | very short patch repair endonuclease                          | -8.79  | 0.041  |
| 44   | SSA_1699  | galactose-6-phosphate isomerase subunit LacA ( <i>lacA</i> )  | -8.79  | 0.041  |
| 45   | SSA_0785  | ATP synthase F0F1 subunit delta ( <i>uncH</i> )               | -8.77  | 0.041  |
| 46   | SSA_1563  | beta-lactamase superfamily hydrolase ( <i>vicX</i> )          | -8.75  | 0.041  |
| 47   | SSA_0121  | hypothetical protein                                          | -8.71  | 0.042  |
| 48   | SSA_1758  | hypothetical protein                                          | -8.65  | 0.043  |
| 49   | SSA_1812  | modification methylase                                        | -8.65  | 0.043  |
| 50   | SSA_0088  | V-type sodium ATPase subunit C ( <i>ntpC</i> )                | -8.63  | 0.044  |
| 51   | SSA_2113  | hypothetical protein                                          | -8.52  | 0.045  |
| 52   | SSA_0906  | CshA-like fibrillar surface protein C ( <i>crpC</i> )         | -8.5   | 0.046  |
| 53   | SSA_0905  | CshA-like fibrillar surface protein B ( <i>crpB</i> )         | -8.35  | 0.049  |
| 54   | SSA_0114  | 50S ribosomal protein L16 ( <i>rpIP</i> )                     | -8.34  | 0.049  |
| 55   | SSA_1121  | cytochrome C-type biogenesis protein                          | -8.33  | 0.049  |
| 56   | SSA_1230  | hypothetical protein                                          | -8.31  | 0.05   |

Table S3 Predicted target genes for csRNA1-3

| Rank | Locus tag | Gene description (Gene)                                       | Energy | Pvalue |
|------|-----------|---------------------------------------------------------------|--------|--------|
| 1    | SSA_2317  | Tfp pilus assembly protein, pilus retraction ATPase PilT      | -15.9  | 0      |
| 2    | SSA_2216  | LPS biosynthesis protein ( <i>licD1</i> )                     | -14    | 0.002  |
| 3    | SSA_1655  | hypothetical protein                                          | -13.2  | 0.003  |
| 4    | SSA_1044  | homoserine kinase ( <i>thrB</i> )                             | -12.7  | 0.005  |
| 5    | SSA_1230  | hypothetical protein                                          | -12.6  | 0.005  |
| 6    | SSA_0297  | malate dehydrogenase ( <i>mleS</i> )                          | -12.5  | 0.005  |
| 7    | SSA_1634  | Heme utilization/adhesion exoprotein                          | -12.5  | 0.005  |
| 8    | SSA_2217  | Cps9H                                                         | -12.4  | 0.006  |
| 9    | SSA_1635  | hypothetical protein                                          | -11.9  | 0.008  |
| 10   | SSA_2345  | hypothetical protein                                          | -11.8  | 0.009  |
| 11   | SSA_0718  | hypothetical protein                                          | -11.6  | 0.01   |
| 12   | SSA_1359  | arginine/histidine ABC transporter permease                   | -11.5  | 0.01   |
| 13   | SSA_1168  | hypothetical protein                                          | -11.5  | 0.01   |
| 14   | SSA_0227  | collagen-binding surface protein                              | -11.4  | 0.011  |
| 15   | SSA_0961  | ketopantoate reductase PanE/ApbA                              | -11.4  | 0.011  |
| 16   | SSA_0521  | ethanolamine utilization protein EutL ( <i>eutL</i> )         | -11.2  | 0.012  |
| 17   | SSA_1702  | hypothetical protein                                          | -11.2  | 0.012  |
| 18   | SSA_0991  | deoxyribonuclease                                             | -11.2  | 0.012  |
| 19   | SSA_1023  | von Willebrand factor A                                       | -10.9  | 0.014  |
| 20   | SSA_1102  | hypothetical protein                                          | -10.7  | 0.016  |
| 21   | SSA_1758  | hypothetical protein                                          | -10.7  | 0.016  |
| 22   | SSA_0131  | 30S ribosomal protein S11 ( <i>rpsK</i> )                     | -10.6  | 0.018  |
| 23   | SSA_1961  | amino acid ABC transporter substrate-binding protein          | -10.4  | 0.019  |
| 24   | SSA_0077  | oxidoreductase                                                | -10.4  | 0.02   |
| 25   | SSA_1809  | PTS system glucose-specific EIIC BA component ( <i>ptsG</i> ) | -10.3  | 0.02   |
| 26   | SSA_1987  | hypothetical protein                                          | -10.3  | 0.02   |
| 27   | SSA_0737  | arginine deiminase ( <i>sagP</i> )                            | -10.2  | 0.021  |
| 28   | SSA_0905  | CshA-like fibrillar surface protein B ( <i>crpB</i> )         | -10.2  | 0.021  |
| 29   | SSA_2245  | recombinase A ( <i>recA</i> )                                 | -10.2  | 0.021  |
| 30   | SSA_2208  | preprotein translocase subunit SecE ( <i>secE</i> )           | -10.2  | 0.022  |
| 31   | SSA_1340  | Zn/Mn ABC transporter                                         | -10.1  | 0.022  |
| 32   | SSA_0061  | tagatose 1,6-diphosphate aldolase                             | -9.96  | 0.024  |
| 33   | SSA_1261  | ribose-5-phosphate isomerase A ( <i>rpiA</i> )                | -9.89  | 0.025  |
| 34   | SSA_0066  | hypothetical protein                                          | -9.72  | 0.027  |
| 35   | SSA_1018  | Zinc metalloprotease zmpC                                     | -9.7   | 0.027  |
| 36   | SSA_0535  | propanediol utilization: dehydratase, medium subunit          | -9.62  | 0.028  |
| 37   | SSA_2121  | cell wall surface anchor family protein                       | -9.55  | 0.029  |
| 38   | SSA_1110  | hypothetical protein                                          | -9.53  | 0.029  |
| 39   | SSA_2318  | PilB-like pili biogenesis ATPase                              | -9.46  | 0.03   |
| 40   | SSA_0906  | CshA-like fibrillar surface protein C ( <i>crpC</i> )         | -9.34  | 0.032  |
| 41   | SSA_0343  | DNA polymerase IV ( <i>dinP</i> )                             | -9.33  | 0.032  |
| 42   | SSA_1148  | Beta-glucosides PTS, EIIC                                     | -9.33  | 0.032  |
| 43   | SSA_0448  | excinuclease ABC subunit A ( <i>uvrA</i> )                    | -9.31  | 0.032  |
| 44   | SSA_2301  | S-layer protein ( <i>lytB</i> )                               | -9.3   | 0.033  |
| 45   | SSA_0541  | acetate kinase                                                | -9.13  | 0.035  |
| 46   | SSA_1248  | hypothetical protein                                          | -8.99  | 0.037  |
| 47   | SSA_0067  | acyltransferase                                               | -8.97  | 0.038  |
| 48   | SSA_2113  | hypothetical protein                                          | -8.96  | 0.038  |
| 49   | SSA_1380  | hypothetical protein                                          | -8.84  | 0.04   |
| 50   | SSA_1317  | hypothetical protein                                          | -8.75  | 0.041  |
| 51   | SSA_0121  | hypothetical protein                                          | -8.71  | 0.042  |
| 52   | SSA_0617  | membrane protease subunit                                     | -8.65  | 0.043  |
| 53   | SSA_0064  | hypothetical protein                                          | -8.61  | 0.044  |
| 54   | SSA_0425  | glycosyltransferase                                           | -8.41  | 0.048  |
| 55   | SSA_0114  | 50S ribosomal protein L16 ( <i>rplP</i> )                     | -8.34  | 0.049  |
| 56   | SSA_1121  | cytochrome C-type biogenesis protein                          | -8.33  | 0.049  |
| 57   | SSA_1633  | FimA fimbrial subunit-like protein                            | -8.31  | 0.05   |

Table S4 Predicted target genes for csRNA2

| Rank | Locus tag | Gene description (Gene)                                 | Energy | Pvalue |
|------|-----------|---------------------------------------------------------|--------|--------|
| 1    | SSA_1229  | hypothetical protein                                    | -12.65 | 0.005  |
| 2    | SSA_1475  | hypothetical protein                                    | -12.43 | 0.006  |
| 3    | SSA_1184  | DNA topoisomerase I ( <i>topA</i> )                     | -11.54 | 0.01   |
| 4    | SSA_1367  | hypothetical protein                                    | -11.29 | 0.012  |
| 5    | SSA_1164  | hypothetical protein                                    | -10.87 | 0.015  |
| 6    | SSA_0230  | hypothetical protein                                    | -10.82 | 0.015  |
| 7    | SSA_1878  | hypothetical protein                                    | -9.18  | 0.034  |
| 8    | SSA_1422  | hypothetical protein                                    | -9.06  | 0.036  |
| 9    | SSA_1859  | Holliday junction-specific endonuclease ( <i>recU</i> ) | -8.6   | 0.044  |
| 10   | SSA_0666  | hypothetical protein                                    | -8.31  | 0.05   |

Table S5 Predicted target genes for csRNA7

| Rank | Locus tag | Gene description (Gene)                                                                | Energy | Pvalue |
|------|-----------|----------------------------------------------------------------------------------------|--------|--------|
| 1    | SSA_0847  | 6-phosphofructokinase ( <i>pfk</i> )                                                   | -12.69 | 0.005  |
| 2    | SSA_1380  | hypothetical protein                                                                   | -12.48 | 0.005  |
| 3    | SSA_1601  | SsrA-binding protein ( <i>smpB</i> )                                                   | -12.15 | 0.007  |
| 4    | SSA_1390  | hypothetical protein                                                                   | -12.15 | 0.007  |
| 5    | SSA_2345  | hypothetical protein                                                                   | -12.09 | 0.007  |
| 6    | SSA_2352  | nitrate/sulfonate/bicarbonate ABC transporter periplasmic protein                      | -12.09 | 0.007  |
| 7    | SSA_1327  | hypothetical protein                                                                   | -11.88 | 0.008  |
| 8    | SSA_0061  | tagatose 1,6-diphosphate aldolase                                                      | -11.47 | 0.01   |
| 9    | SSA_0684  | fibril-like structure subunit FibA                                                     | -11.21 | 0.012  |
| 10   | SSA_2309  | fimbrial assembly protein                                                              | -10.86 | 0.015  |
| 11   | SSA_1474  | lipoprotein                                                                            | -10.55 | 0.018  |
| 12   | SSA_1984  | cell surface SD repeat-containing protein                                              | -10.48 | 0.018  |
| 13   | SSA_2301  | S-layer protein ( <i>lytB</i> )                                                        | -10.18 | 0.021  |
| 14   | SSA_0303  | surface protein C ( <i>sspC</i> )                                                      | -10.03 | 0.023  |
| 15   | SSA_1022  | group 1 glycosyl transferase                                                           | -9.91  | 0.024  |
| 16   | SSA_0258  | hypothetical protein                                                                   | -9.78  | 0.026  |
| 17   | SSA_2299  | hypothetical protein                                                                   | -9.78  | 0.026  |
| 18   | SSA_1657  | hypothetical protein                                                                   | -9.77  | 0.026  |
| 19   | SSA_2313  | hypothetical protein                                                                   | -9.74  | 0.027  |
| 20   | SSA_0784  | ATP synthase F0F1 subunit B ( <i>uncF</i> )                                            | -9.59  | 0.029  |
| 21   | SSA_2279  | hypothetical protein                                                                   | -9.56  | 0.029  |
| 22   | SSA_2254  | Holliday junction DNA helicase RuvA ( <i>ruvA</i> )                                    | -9.5   | 0.03   |
| 23   | SSA_1632  | surface protein                                                                        | -9.39  | 0.031  |
| 24   | SSA_0967  | hypothetical protein                                                                   | -9.35  | 0.032  |
| 25   | SSA_2217  | Cps9H                                                                                  | -9.34  | 0.032  |
| 26   | SSA_0035  | bifunctional phosphoribosylaminoimidazolecarboxamide formyltransferase ( <i>purH</i> ) | -9.29  | 0.033  |
| 27   | SSA_2222  | tyrosine-protein kinase Wze                                                            | -9.23  | 0.034  |
| 28   | SSA_1019  | collagen-binding surface protein                                                       | -9.16  | 0.035  |
| 29   | SSA_1225  | branched-chain amino acid aminotransferase ( <i>ilvE</i> )                             | -9.15  | 0.035  |
| 30   | SSA_2216  | LPS biosynthesis protein ( <i>licD1</i> )                                              | -9.12  | 0.035  |
| 31   | SSA_2017  | hypothetical protein                                                                   | -9.12  | 0.035  |
| 32   | SSA_1466  | prephenate dehydrogenase ( <i>tyrA</i> )                                               | -9.11  | 0.035  |
| 33   | SSA_1985  | hypothetical protein                                                                   | -9.02  | 0.037  |
| 34   | SSA_1231  | hypothetical protein                                                                   | -9.02  | 0.037  |
| 35   | SSA_0737  | arginine deiminase ( <i>sagP</i> )                                                     | -8.8   | 0.041  |
| 36   | SSA_0565  | hypothetical protein                                                                   | -8.73  | 0.042  |
| 37   | SSA_0227  | collagen-binding surface protein                                                       | -8.71  | 0.042  |
| 38   | SSA_1113  | two-component response transcriptional regulator                                       | -8.65  | 0.043  |
| 39   | SSA_1989  | ABC transporter ATPase                                                                 | -8.63  | 0.044  |
| 40   | SSA_2312  | hypothetical protein                                                                   | -8.55  | 0.045  |
| 41   | SSA_0761  | XRE family transcriptional regulator                                                   | -8.54  | 0.045  |
| 42   | SSA_1492  | hypothetical protein                                                                   | -8.47  | 0.047  |
| 43   | SSA_2282  | Phage infection protein                                                                | -8.33  | 0.049  |
| 44   | SSA_1230  | hypothetical protein                                                                   | -8.31  | 0.05   |
| 45   | SSA_1547  | HPr kinase/phosphorylase ( <i>ptsK</i> )                                               | -8.29  | 0.05   |

Table S6 Predicted target genes for csRNA8

| Rank | Locus tag | Gene description (Gene)                                            | Energy | Pvalue |
|------|-----------|--------------------------------------------------------------------|--------|--------|
| 1    | SSA_1655  | hypothetical protein                                               | -14.6  | 0.001  |
| 2    | SSA_0158  | hypothetical protein                                               | -12.57 | 0.005  |
| 3    | SSA_2230  | anaerobic ribonucleoside triphosphate reductase ( <i>nrdD</i> )    | -12.51 | 0.005  |
| 4    | SSA_1842  | two-component response transcriptional regulator                   | -11.11 | 0.013  |
| 5    | SSA_0678  | ArgR family transcriptional regulator ( <i>ahrC</i> )              | -10.81 | 0.015  |
| 6    | SSA_0515  | propanediol utilization protein PduU                               | -10.35 | 0.02   |
| 7    | SSA_1612  | diacylglycerol kinase ( <i>dgk</i> )                               | -10.14 | 0.022  |
| 8    | SSA_0830  | glycosyltransferase                                                | -10.09 | 0.022  |
| 9    | SSA_1533  | glutathione reductase ( <i>gor</i> )                               | -9.96  | 0.024  |
| 10   | SSA_0718  | hypothetical protein                                               | -9.89  | 0.025  |
| 11   | SSA_0162  | hypothetical protein                                               | -9.78  | 0.026  |
| 12   | SSA_1044  | homoserine kinase ( <i>thrB</i> )                                  | -9.53  | 0.029  |
| 13   | SSA_0785  | ATP synthase F0F1 subunit delta ( <i>unch</i> )                    | -9.49  | 0.03   |
| 14   | SSA_1173  | lipoate protein ligase A ( <i>lpA</i> )                            | -9.21  | 0.034  |
| 15   | SSA_0139  | copper transport operon or penicillinase transcriptional repressor | -9.2   | 0.034  |
| 16   | SSA_1230  | hypothetical protein                                               | -9     | 0.037  |
| 17   | SSA_1634  | Heme utilization/adhesion exoprotein                               | -8.97  | 0.038  |
| 18   | SSA_1221  | L-lactate dehydrogenase ( <i>ldh</i> )                             | -8.95  | 0.038  |
| 19   | SSA_1929  | macrophage infectivity potentiator protein ( <i>mip</i> )          | -8.87  | 0.039  |
| 20   | SSA_2312  | hypothetical protein                                               | -8.62  | 0.044  |
| 21   | SSA_1762  | permease                                                           | -8.6   | 0.044  |
| 22   | SSA_1995  | hypothetical protein                                               | -8.48  | 0.046  |
| 23   | SSA_1835  | late competence protein ( <i>comFC</i> )                           | -8.46  | 0.047  |
| 24   | SSA_0507  | hypothetical protein                                               | -8.43  | 0.047  |
| 25   | SSA_2119  | pentose-5-phosphate-3-epimerase ( <i>rpe</i> )                     | -8.42  | 0.047  |
| 26   | SSA_0121  | hypothetical protein                                               | -8.33  | 0.049  |

Table S7 *Streptococcus sanguinis* strains used in this study

| Strain Name                                   | Information                                                                                                                                                                                              | Reference or source |
|-----------------------------------------------|----------------------------------------------------------------------------------------------------------------------------------------------------------------------------------------------------------|---------------------|
| 10556                                         | <i>Streptococcus sanguinis</i> type strain                                                                                                                                                               | ATCC                |
| WT Mock                                       | 10556 containing empty shuttle vector pVA838                                                                                                                                                             | This study          |
| $\Delta$ <i>ciaRH</i> Mock                    | 10556 derivative in which the <i>ciaRH</i> gene has been replaced with a spectinomycin resistance cassette; also contains empty shuttle vector pVA838                                                    | This study          |
| $\Delta$ <i>ciaRH</i> +pVA <i>ciaRH</i>       | $\Delta$ <i>ciaRH</i> containing the pVA838 derivative pVA <i>ciaRH</i> , which contains a wild-type <i>ciaRH</i> allele downstream of the natural promoter                                              | This study          |
| $\Delta$ <i>csRNA1-1, 2</i> Mock              | 10556 derivative in which the <i>csRNA1-1</i> and <i>csRNA1-2</i> genes have been replaced with a spectinomycin resistance cassette; also contains empty shuttle vector pVA838                           | This study          |
| $\Delta$ <i>csRNA1-1, 2</i> +pVA1-1, 2        | $\Delta$ <i>csRNA1-1, 2</i> containing the pVA838 derivative pVA1-1, 2, which contains wild-type <i>csRNA1-1</i> and <i>csRNA1-2</i> alleles downstream of their natural promoters                       | This study          |
| WT-luc Mock                                   | 10556 derivative in which promoter-less luciferase ( <i>NanoLuc</i> ) gene and a tetracycline resistance cassette have been substituted with <i>pilT</i> gene; also contains empty shuttle vector pVA838 | This study          |
| $\Delta$ <i>csRNA1-1, 2</i> -luc Mock         | WT-luc derivative in which the <i>csRNA1-1</i> and <i>csRNA1-2</i> genes have been replaced with a spectinomycin resistance cassette; also contains empty shuttle vector pVA838                          | This study          |
| $\Delta$ <i>csRNA1-1, 2</i> -luc+pVA1-1, 2    | $\Delta$ <i>csRNA1-1, 2</i> -luc containing the pVA838 derivative pVA1-1, 2                                                                                                                              | This study          |
| $\Delta$ <i>csRNA1-1, 2</i> -luc+pVA1-1       | $\Delta$ <i>csRNA1-1, 2</i> -luc containing the pVA838 derivative pVA1-1, which contains wild-type <i>csRNA1-1</i> allele downstream of the natural promoter                                             | This study          |
| $\Delta$ <i>csRNA1-1, 2</i> -luc+pVA1-2       | $\Delta$ <i>csRNA1-1, 2</i> -luc containing the pVA838 derivative pVA1-2, which contains wild-type <i>csRNA1-2</i> allele downstream of the natural promoter                                             | This study          |
| $\Delta$ <i>csRNA1-1, 2</i> -luc+pVA1-1 mut-1 | $\Delta$ <i>csRNA1-1, 2</i> -luc containing the pVA1-1 derivative pVA1-1 mut-1, which contains seven nucleotide substitutions within the putative region for base-pairing with <i>pilT</i> mRNA          | This study          |
| $\Delta$ <i>csRNA1-1, 2</i> -luc+pVA1-1 mut-2 | $\Delta$ <i>csRNA1-1, 2</i> -luc containing the pVA1-1 derivative pVA1-1 mut-2, which contains four nucleotide substitutions within the putative region for base-pairing with <i>pilT</i> mRNA           | This study          |
| $\Delta$ <i>csRNA1-1, 2</i> -luc+pVA1-1 mut-3 | $\Delta$ <i>csRNA1-1, 2</i> -luc containing the pVA1-1 derivative pVA1-1 mut-3, which contains three nucleotide substitutions within the putative region for base-pairing with <i>pilT</i> mRNA          | This study          |

Table S8 Oligonucleotide primers used in the study

| Primer name       | Sequence (5'-3')                | Description                                                                                                                                                                                |
|-------------------|---------------------------------|--------------------------------------------------------------------------------------------------------------------------------------------------------------------------------------------|
| CiaR-up-Hind-F    | TATAAGCTTCCTTGCGACAGCTATTCACGG  | Primer to amplify the upstream fragment of <i>ciaRH</i> in the creation of <i>ciaRH</i> deletion mutant and to amplify <i>ciaRH</i> containing fragment in the creation of plasmid pVAciRH |
| CiaR-up-Pst-R     | TATCTGCAGTAAGTTTTTCTACGACTGCGAC | Primer to amplify the upstream fragment of <i>ciaRH</i> in the creation of <i>ciaRH</i> deletion mutant                                                                                    |
| CiaR-down-Sma-F   | TATCCCGGGCTCTTCGTAGTGTCGGCTAC   | Primer to amplify the downstream fragment of <i>ciaRH</i> in the creation of <i>ciaRH</i> deletion mutant                                                                                  |
| CiaR-down-Eco-R   | TATGAATTCGTCTGACCAAAGCTGTTGCC   | Primer to amplify the downstream fragment of <i>ciaRH</i> in the creation of <i>ciaRH</i> deletion mutant                                                                                  |
| CiaH-down-Sal-R   | CCTTGCTCTAAAGTCGACAGC           | Primer to amplify <i>ciaRH</i> containing fragment in the creation of plasmid pVAciRH                                                                                                      |
| csRNA1-1_real-F   | TGAAGCCCCCTAACTTTGTTTG          | RT-PCR primer for csRNA1-1                                                                                                                                                                 |
| csRNA1-1_real-R   | CCAGATTGGGTGGCCTTTAT            | RT-PCR primer for csRNA1-1                                                                                                                                                                 |
| csRNA1-2_real-F   | GAAGACCTCCTAACTTTATTTG          | RT-PCR primer for csRNA1-2                                                                                                                                                                 |
| csRNA1-2_real-R   | CCGATTGGGTGGCCTTTAT             | RT-PCR primer for csRNA1-2                                                                                                                                                                 |
| csRNA1-3_real-F   | CACTGGGGTGACTTTCAGGA            | RT-PCR primer for csRNA1-3                                                                                                                                                                 |
| csRNA1-3_real-R   | CAAAGACCTCCTAACTTTG             | RT-PCR primer for csRNA1-3                                                                                                                                                                 |
| csRNA2_real-F     | TTGGGCGGTTCTTATAGGGA            | RT-PCR primer for csRNA2                                                                                                                                                                   |
| csRNA2_real-R     | GATCTCCTAACTTTGTTTAG            | RT-PCR primer for csRNA2                                                                                                                                                                   |
| csRNA7_real-F     | TAACTTAACTCCTAAAACCTTTTTTC      | RT-PCR primer for csRNA7                                                                                                                                                                   |
| csRNA7_real-R     | AAACCACCGTTTGGTGGCT             | RT-PCR primer for csRNA7                                                                                                                                                                   |
| csRNA8_real-F     | AGCTTGAAGACTAGAAGAC             | RT-PCR primer for csRNA8                                                                                                                                                                   |
| csRNA8_real-R     | GCTTGTGATTTGTTAGGAG             | RT-PCR primer for csRNA8                                                                                                                                                                   |
| SSA_2345_real-F   | AAACGCCGAAAAACCAAGGC            | RT-PCR primer for SSA_2345                                                                                                                                                                 |
| SSA_2346_real-R   | GGCTGATACCAGCAGCTTGA            | RT-PCR primer for SSA_2345                                                                                                                                                                 |
| licD1_real-F      | GTTCTTTGCGACATGGAGGC            | RT-PCR primer for <i>licD1</i>                                                                                                                                                             |
| licD2_real-R      | CGCATCCGCAGGAGAGATTA            | RT-PCR primer for <i>licD1</i>                                                                                                                                                             |
| Sang16S-F         | CGTAAACGATGAGTGCTAGGTG          | RT-PCR primer for 16S ribosomal RNA                                                                                                                                                        |
| Sang16S-R         | TAGAGCGGTCAGAGGGATGT            | RT-PCR primer for 16S ribosomal RNA                                                                                                                                                        |
| csRNA1-up-Sph-F   | TATGCATGCGGCTGATGCAGAGCGTGAC    | Primer to amplify the upstream fragment of <i>csRNA1-1</i> in the creation of <i>csRNA1-1</i> , <i>csRNA1-2</i> double deletion mutant                                                     |
| csRNA1-up-Sal-R   | TATGTCGACGGAGGCTTTTCCCTTGCTC    | Primer to amplify the upstream fragment of <i>csRNA1-1</i> in the creation of <i>csRNA1-1</i> , <i>csRNA1-2</i> double deletion mutant                                                     |
| csRNA1-down-Sma-F | TATCCCGGGTTCAGACGTGGATTAG       | Primer to amplify the downstream fragment of <i>csRNA1-2</i> in the creation of <i>csRNA1-1</i> , <i>csRNA1-2</i> double deletion mutant                                                   |
| csRNA1-down-Eco-R | TATGAATTCGCGACTGGTCTCACCTGAG    | Primer to amplify the downstream fragment of <i>csRNA1-2</i> in the creation of <i>csRNA1-1</i> , <i>csRNA1-2</i> double deletion mutant                                                   |
| csRNA-Sph-F       | TATGCATGCGAAACAATCGCGAAAGAGC    | Used in the creation of <i>csRNA1-1</i> and/or <i>csRNA1-2</i> complementation plasmid pVA1-1, 2 and pVA1-1                                                                                |
| csRNA-Sal-R       | TATGTCGACTAATCCACGTCTGAAC       | Used in the creation of <i>csRNA1-1</i> and/or <i>csRNA1-2</i> complementation plasmid pVA1-1, 2 and pVA1-2                                                                                |
| csRNA1-1-Sal-R    | TATGTCGACAATCCGATAAACTTCCCGTC   | Used in the creation of <i>csRNA1-1</i> complementation plasmid pVA1-1                                                                                                                     |



|                    |                                                                                                                   |                                                                                                                                              |
|--------------------|-------------------------------------------------------------------------------------------------------------------|----------------------------------------------------------------------------------------------------------------------------------------------|
| csRNA1-2-Sph-F     | TATGCATGCGAATAAGACGGGAAGTTTATCGG                                                                                  | Used in the creation of <i>csRNA1-1</i> complementation plasmid pVA1-2                                                                       |
| csRNA1-1-mut-1-F   | CCCCTAACTTTGTTTGATAATTTTCGGGTTTTTTCATAATAATCTCCC                                                                  | Used in the creation of <i>csRNA1-1</i> mutant expression plasmid pVA1-1 mut-1                                                               |
| csRNA1-1-mut-1-R   | GGGAGATTATTATGAAAAAACCCGAAATTATCAAACAAAGTTAGGGG                                                                   | Used in the creation of <i>csRNA1-1</i> mutant expression plasmid pVA1-1 mut-1                                                               |
| csRNA1-1-mut-2-F   | CCTAACCTTGTCTGATAATCTGGGTTTTTTCATAATAATCTCCC                                                                      | Used in the creation of <i>csRNA1-1</i> mutant expression plasmid pVA1-1 mut-2                                                               |
| csRNA1-1-mut-2-R   | GGGAGATTATTATGAAAAAACCCAGGATTATCAAACAAAGTTAGG                                                                     | Used in the creation of <i>csRNA1-1</i> mutant expression plasmid pVA1-1 mut-2                                                               |
| csRNA1-1-mut-3-F   | CCTAACCTTGTCTGATAATTTCAAACTTTTTCATAATAATCTCCC                                                                     | Used in the creation of <i>csRNA1-1</i> mutant expression plasmid pVA1-1 mut-3                                                               |
| csRNA1-1-mut-3-R   | GGGAGATTATTATGAAAAAGTTTGAAATTATCAAACAAAGTTAGG                                                                     | Used in the creation of <i>csRNA1-1</i> mutant expression plasmid pVA1-1 mut-3                                                               |
| pilT-real-F        | AAACAACCTGCGGGATTGCC                                                                                              | RT-PCR primer for <i>pilT</i>                                                                                                                |
| pilT-real-R        | GCTTCCTGTTGGCCCGGTAA                                                                                              | RT-PCR primer for <i>pilT</i>                                                                                                                |
| pilT-up-Sph-F      | TATGCATGCTGGACTGACCTTCGCGAGTG                                                                                     | Primer to amplify the upstream fragment of <i>pilT</i> fused to <i>NanoLuc</i> in the creation of PilT reporter strain                       |
| pilT-up-luc-R      | CAACGAAATCTTCGAGTGTGAAGACCATCCTAAACTTCCCCTTCTAGACTAAAGGC                                                          | Primer to amplify the upstream fragment of <i>pilT</i> fused to <i>NanoLuc</i> in the creation of PilT reporter strain                       |
| pilT-up-luc-F      | GCCTTTAGTCTAGAAGGGGAAGTTTAGGATGGTCTTCACACTCGAAGATTTTCGTTG                                                         | Primer to amplify <i>NanoLuc</i> fused to the upstream fragment of <i>pilT</i> in the creation of PilT reporter strain                       |
| luc-Sal-R          | TATGTCGACTTACGCCAGAATGCGTTTCGCACAGC                                                                               | Primer to amplify <i>NanoLuc</i> fused to the upstream fragment of <i>pilT</i> in the creation of PilT reporter strain                       |
| pilT-down-Sma-F    | TATCCCGGGCCTACTCAGTGGATCGCGCTCAAGTTG                                                                              | Primer to amplify the downstream fragment of <i>pilT</i> in the creation of PilT reporter strain                                             |
| pilT-down-Eco-R    | TATGAATTCCTTTTCCAGCACCTCGTCC                                                                                      | Primer to amplify the downstream fragment of <i>pilT</i> in the creation of PilT reporter strain                                             |
| T7-pilT-F          | CTAATACGACTCACTATAGGGAGAGCCTTTAGTCTAGAAGGGAAAG                                                                    | Primer to amplify <i>pilT</i> (WT) and place downstream of T7 promoter for use as template in the <i>in vitro</i> transcription              |
| T7-pilT-mut-F      | CTAATACGACTCACTATAGGGAGAGCCTTTAGTCTAGAAGGGAAACCCAGGATGAATTTGGATGAGTTAATTAAGCAGGC                                  | Primer to amplify <i>pilT</i> (mut) and place downstream of T7 promoter for use as template in the <i>in vitro</i> transcription             |
| pilT-R             | ATATACTGTCATGCTCTAGTACC                                                                                           | Primer to amplify <i>pilT</i> (WT) or (mut) and place downstream of T7 promoter for use as template in the <i>in vitro</i> transcription     |
| T7-csRNA1-1-R      | AAAAAAAGACCACCAGATTGGGTGGCCTTTATGGGAGATTTATGAAAAAGTTTAGGATTATCAAACAAAGTTAGGGGGCTTCATTTGATTCTCCCTATAGTGAGTCGTATTAG | Used with T7-F as template for <i>in vitro</i> transcription of csRNA1-1                                                                     |
| T7-F               | CTAATACGACTCACTATAGGGAGA                                                                                          | Used with T7-csRNA1-1-R or with T7-csRNA1-1-mut-2-R as template for <i>in vitro</i> transcription of csRNA1-1 or csRNA1-1 mut-2 respectively |
| T7-csRNA1-1-mut2-R | AAAAAAAGACCACCAGATTGGGTGGCCTTTATGGGAGATTTATGAAAAAACCCAGGATTATCAAACAAAGTTAGGGGGCTTCATTTGATTCTCCCTATAGTGAGTCGTATTAG | Used with T7-F as template for <i>in vitro</i> transcription of csRNA1-1 mut-2                                                               |

**A**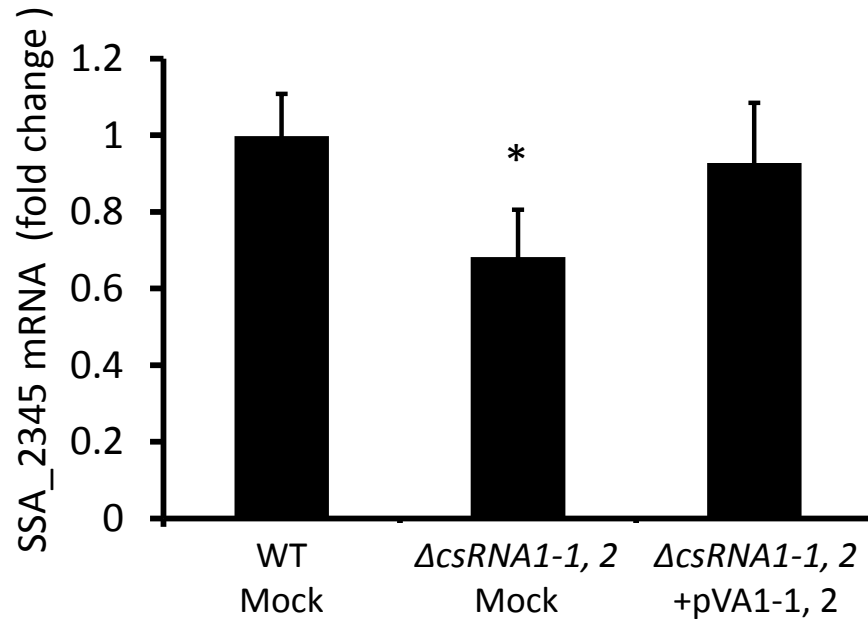**B**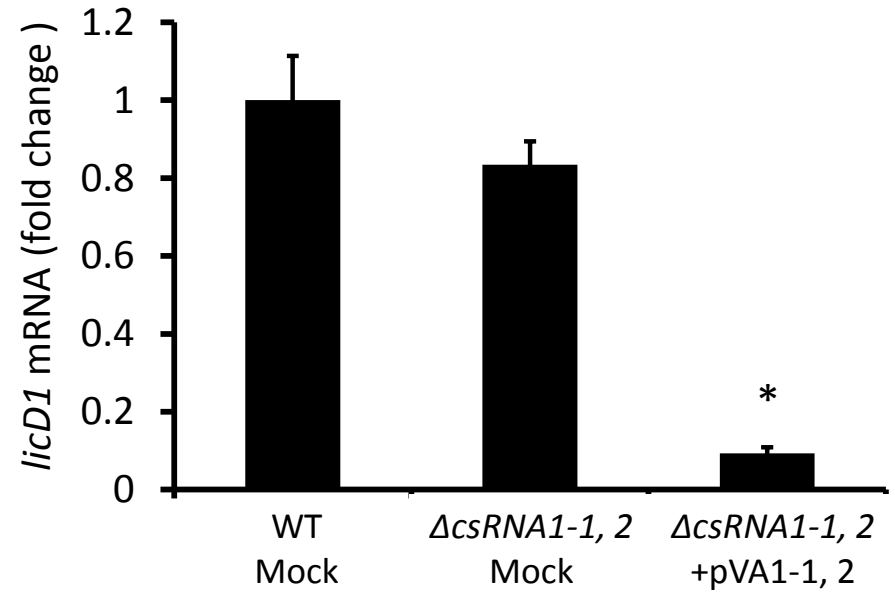

**FIG S1** Quantitative RT-PCR analysis of *SSA\_2345* (A) and *licD1* (B) expressions in *S. sanguinis*.  $\Delta csRNA1-1, 2$  strain was transformed with either complementation plasmid pVA1-1,2 or empty vector pVA838 (Mock). Strains were grown in BHI broth to the early exponential phase, and RNA was isolated and used in quantitative RT-PCR analysis. Data are expressed as mean  $\pm$  SD from triplicate experiments. \*,  $P < 0.01$ .

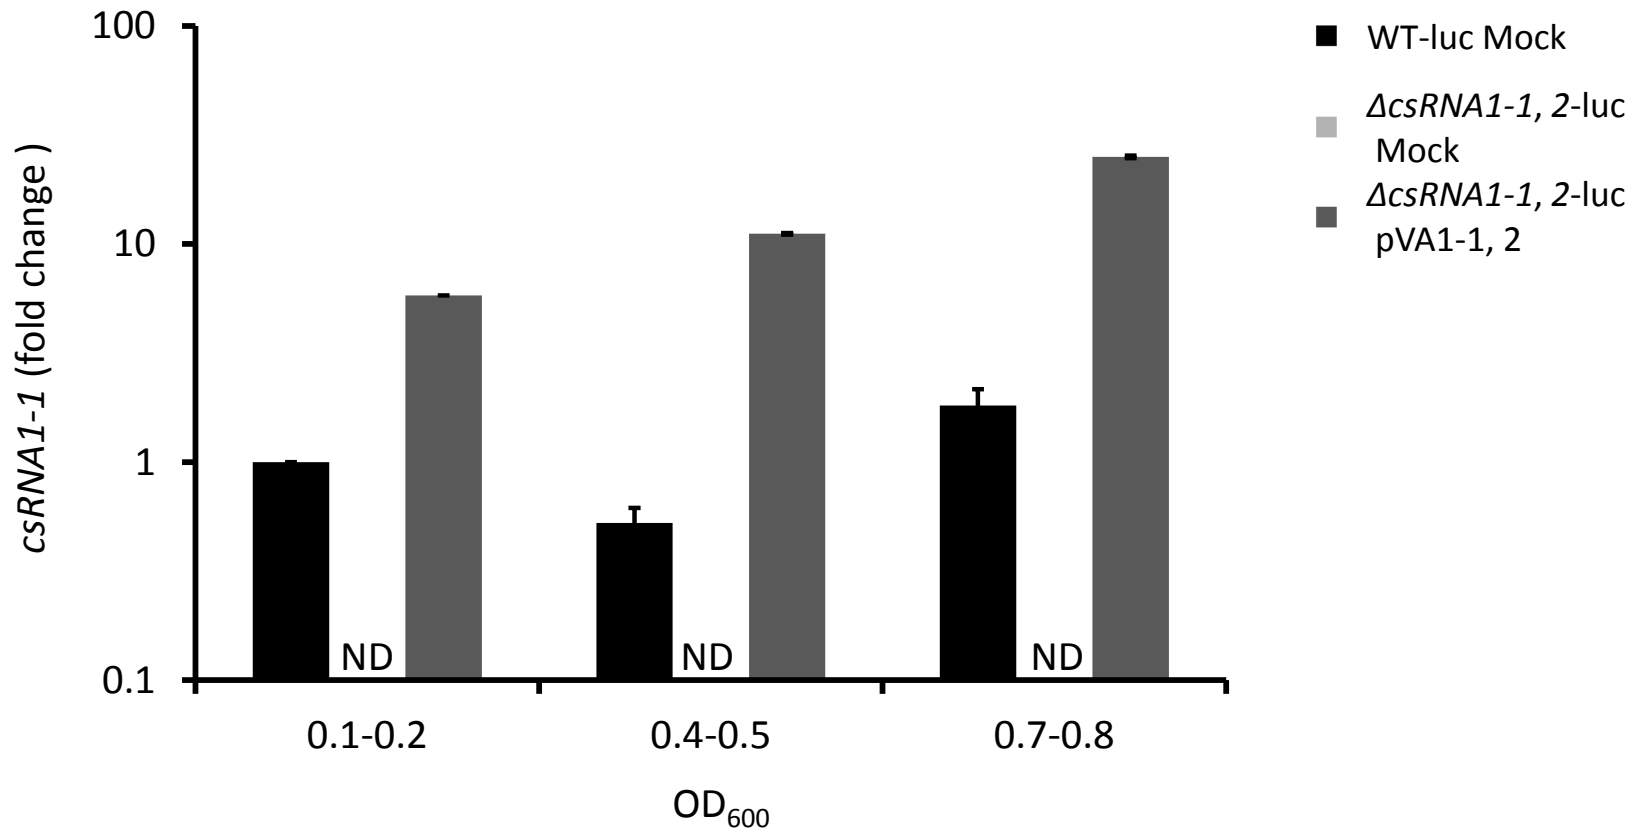

**FIG S2** Growth phase-dependent expression of *csRNA1-1*. PiIT-luciferase reporter strains were grown over a 6-h period, and samples were collected for RNA preparation at  $OD_{600}$  of 0.1–0.2 (early-log phase), 0.4–0.5 (mid-log phase) and 0.7–0.8 (late-log phase). The extracted RNA was used in quantitative RT-PCR analysis of *csRNA1-1* expression. Data are shown as fold change relative to WT-luc Mock strain at  $OD_{600}$ =0.1–0.2, and are expressed as mean  $\pm$  SD from triplicate experiments. The vertical axis is shown in logarithmic scale. ND, not detected.
